# Supplementary material for: Detection and benchmarking of somatic mutations in cancer genomes using RNA-seq data
Source: PubMed Central journal article supplement (PMC6074801; doi:10.7717/peerj.5362), 2018-07-31

## Supplementary Figure S4

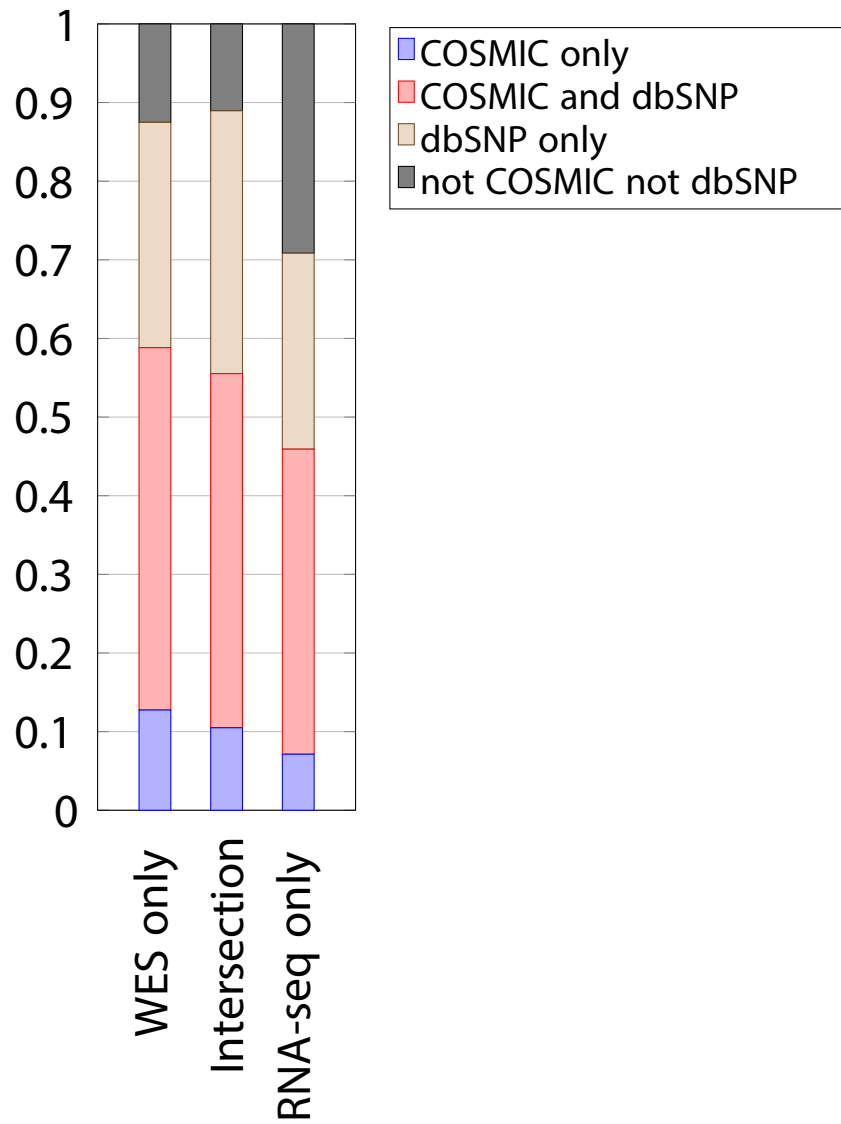

Supplement: peerj-06-5362-s004.pdf [file peerj-06-5362-s004.pdf]
